# Supplementary material for: Sex Differences in the Effect of Resveratrol on DSS-Induced Colitis in Mice
Source: Hindawi journal article supplement (doi:10.1155/2017/8051870), 2017-01-01
Supplement: f1 [file 8051870.f1.pdf]

## Supplementary statistics for 2-way ANOVA

Figure 1. Weight loss time course. In females, there was a significant difference between CTRL and DSS+RSV groups at days 8 ( $t = 3.11$ ), 9 ( $t = 3.61$ ), 10 ( $t = 4.02$ ), 11 ( $t = 4.31$ ), 12 ( $t = 3.29$ ), 13 ( $t = 4.86$ ) and between DSS and DSS+RSV groups at days 10 ( $t = 3.43$ ), 11 ( $t = 3.01$ ), 12 ( $t = 3.75$ ), 13 ( $t = 3.78$ ) (a). Significant differences between sexes were observed in CTRL groups on day 8 ( $t = 3.25$ ) and in DSS+RSV groups on day 10 ( $t = 2.96$ ), males in comparison with females (c and e). CTRL, control; DSS, dextran sulfate sodium; RSV, resveratrol.

Variation showed these results:

| F values            | a    | b      | c    | d    | e    |
|---------------------|------|--------|------|------|------|
| Interaction         | 4.30 | 1.51   | 3.74 | 1.35 | 7.15 |
| Time                | 14.3 | 5.57   | 5.19 | 6.84 | 11.9 |
| Column Factor       | 4.40 | 0.0661 | 2.21 | 1.22 | 1.14 |
| Subjects (matching) | 15.9 | 14.3   | 27.7 | 9.48 | 20.0 |

Figure 2. Stool consistency time course. In females, there was a significant difference between CTRL and DSS groups at days 6 ( $t = 3.47$ ), 7 ( $t = 3.47$ ), 9 ( $t = 4.24$ ), 10 ( $t = 6.17$ ), 11 ( $t = 6.56$ ), 12 ( $t = 6.17$ ), 13 ( $t = 4.24$ ) and between CTRL and DSS+RSV groups at days 6 ( $t = 3.06$ ), 7 ( $t = 4.46$ ), 8 ( $t = 5.07$ ), 9 ( $t = 6.55$ ), 10 ( $t = 7.69$ ), 11 ( $t = 7.69$ ), 12 ( $t = 7.69$ ), 13 ( $t = 5.51$ ) (a). In males, there was a significant difference between CTRL and DSS groups at days 8 ( $t = 3.30$ ), 11 ( $t = 5.11$ ), 12 ( $t = 4.30$ ), 13 ( $t = 7.21$ ), between CTRL and DSS+RSV groups at days 11 ( $t = 3.27$ ), 12 ( $t = 3.27$ ), 13 ( $t = 6.29$ ) and between DSS and DSS+RSV groups at day 6 ( $t = 3.00$ ) (b). Significant differences between sexes were observed in DSS groups on day 13 ( $t = 3.07$ ) and in DSS+RSV groups on days 6 ( $t = 4.13$ ), 8 ( $t = 4.34$ ), 9 ( $t = 3.83$ ) (d and e). CTRL, control; DSS, dextran sulfate sodium; RSV, resveratrol.

Variation showed these results:

| F values      | a    | b    | c    | d       | e    |
|---------------|------|------|------|---------|------|
| Interaction   | 6.77 | 4.40 | 1.74 | 2.34    | 3.81 |
| Time          | 14.5 | 13.5 | 1.41 | 23.2    | 31.2 |
| Column Factor | 25.8 | 10.7 | 6.40 | 0.00967 | 11.0 |

|                     |      |      |      |      |      |
|---------------------|------|------|------|------|------|
| Subjects (matching) | 4.43 | 2.37 | 1.81 | 3.53 | 3.97 |
|---------------------|------|------|------|------|------|

Figure 3. Discomfort time course. In females, there was a significant difference between CTRL and DSS groups at day 8 ( $t = 3.03$ ), between CTRL and DSS+RSV groups at days 9 ( $t = 4.57$ ), 10 ( $t = 4.26$ ), 11 ( $t = 4.87$ ), 12 ( $t = 5.48$ ), 13 ( $t = 5.48$ ) and between DSS and DSS+RSV groups at days 11 ( $t = 3.91$ ), 12 ( $t = 3.81$ ), 13 ( $t = 3.81$ ) (a). In males, there was a significant difference between CTRL and DSS+RSV groups at day 6 ( $t = 3.14$ ) (b). Significant differences between sexes were observed in DSS groups on days 11 ( $t = 3.56$ ), 12 ( $t = 3.56$ ), 13 ( $t = 3.56$ ); in DSS groups at day ( $t = 2.97$ ) and in DSS+RSV groups on days 6 ( $t = 3.11$ ), 8 ( $t = 2.99$ ) (c, d and e). CTRL, control; DSS, dextran sulfate sodium; RSV, resveratrol.

Variation showed these results:

| F values            | a    | b    | c    | d     | e    |
|---------------------|------|------|------|-------|------|
| Interaction         | 4.29 | 1.12 | 2.28 | 0.977 | 2.15 |
| Time                | 10.7 | 11.8 | 2.28 | 8.86  | 21.0 |
| Column Factor       | 8.16 | 3.78 | 22.1 | 5.61  | 2.24 |
| Subjects (matching) | 5.14 | 4.17 | 2.00 | 4.17  | 5.83 |
